# Supplementary material for: Influence of Carbon Sources on the Phenolic Compound Production by Euglena gracilis Using an Untargeted Metabolomic Approach
Source: MDPI journal article supplement (doi:10.3390/biom12060795), 2022-06-07
Supplement: s1 [file s1]

INFLUENCE OF CARBON SOURCES ON THE PHENOLIC COMPOUND PRODUCTION BY  
EUGLENA GRACILIS USING AN UNTARGETED METABOLOMIC APPROACH

Eve Bernard<sup>1</sup>, Céline Guéguen<sup>1,\*</sup>

<sup>1</sup> Université de Sherbrooke, Département de chimie, Sherbrooke, QC, CANADA

\*corresponding author: [celine.gueguen@usherbrooke.ca](mailto:celine.gueguen@usherbrooke.ca)

Supplemental information

Tables S1-S2

Figures S1-S7

**Table S1.** Retention time and linearity of the phenolic standards

| Standard         | Retention time ( $\pm 0.1\text{min}$ ) | R <sup>2</sup> |
|------------------|----------------------------------------|----------------|
| Gallic acid      | 2.7                                    | 1.0000         |
| Cathechin        | 4.8                                    | 0.9999         |
| Chlorogenic acid | 5.4                                    | 0.9999         |
| Caffeic acid     | 5.9                                    | 0.9995         |
| P-Coumaric acid  | 6.4                                    | 0.9999         |
| Ferrulic acid    | 8.1                                    | 0.9998         |
| Naringenin       | 10.8                                   | 0.9999         |
| Quercetin        | 11.0                                   | 0.9999         |
| Kaempferol       | 12.3                                   | 1.0000         |

**Table S2.** Weighted average of elemental ratios and indices of the five LC-MS fractions F1-F5.

| Carbon source        | Fraction | O/C               | H/C               | Almod              | DBE                | NOSC              |
|----------------------|----------|-------------------|-------------------|--------------------|--------------------|-------------------|
| <b>Glutamic acid</b> | 1        | 0.429 $\pm$ 0.016 | 1.057 $\pm$ 0.088 | 0.443 $\pm$ 0.060  | 1.333 $\pm$ 0.350  | 0.058 $\pm$ 0.097 |
|                      | 2        | 0.488 $\pm$ 0.043 | 0.887 $\pm$ 0.091 | 0.509 $\pm$ 0.069  | 2.000 $\pm$ 0.667  | 0.460 $\pm$ 0.040 |
|                      | 3        | 0.481 $\pm$ 0.046 | 1.333 $\pm$ 0.000 | -0.412 $\pm$ 0.416 | -0.500 $\pm$ 0.354 | 0.500 $\pm$ 0.589 |
|                      | 4        | 0.574 $\pm$ 0.020 | 1.092 $\pm$ 0.032 | 0.340 $\pm$ 0.014  | 0.016 $\pm$ 0.459  | 0.193 $\pm$ 0.097 |
|                      | 5        | 0.505 $\pm$ 0.006 | 1.165 $\pm$ 0.010 | 0.305 $\pm$ 0.008  | -0.828 $\pm$ 0.016 | 0.401 $\pm$ 0.027 |
| <b>Glucose</b>       | 1        | 0.919 $\pm$ 0.224 | 1.874 $\pm$ 0.376 | 0.302 $\pm$ 0.143  | -1.164 $\pm$ 0.389 | 0.671 $\pm$ 0.185 |
|                      | 2        | 0.621 $\pm$ 0.056 | 1.013 $\pm$ 0.018 | 0.443 $\pm$ 0.023  | 0.091 $\pm$ 0.392  | 0.428 $\pm$ 0.044 |
|                      | 3        | 0.581 $\pm$ 0.019 | 1.353 $\pm$ 0.020 | 0.019 $\pm$ 0.089  | -1.959 $\pm$ 0.347 | 0.392 $\pm$ 0.130 |
|                      | 4        | 0.628 $\pm$ 0.032 | 1.098 $\pm$ 0.101 | 0.167 $\pm$ 0.137  | -1.527 $\pm$ 0.458 | 0.472 $\pm$ 0.044 |
|                      | 5        | 0.589 $\pm$ 0.026 | 1.102 $\pm$ 0.056 | 0.188 $\pm$ 0.068  | -1.152 $\pm$ 0.404 | 0.411 $\pm$ 0.038 |
| <b>Malic acid</b>    | 1        | 0.509 $\pm$ 0.009 | 0.884 $\pm$ 0.043 | 0.534 $\pm$ 0.036  | 0.866 $\pm$ 0.236  | 0.300 $\pm$ 0.041 |
|                      | 2        | 0.530 $\pm$ 0.010 | 0.993 $\pm$ 0.088 | 0.456 $\pm$ 0.062  | 0.419 $\pm$ 0.437  | 0.091 $\pm$ 0.102 |
|                      | 3        | 0.557 $\pm$ 0.012 | 0.978 $\pm$ 0.081 | 0.467 $\pm$ 0.061  | 0.020 $\pm$ 0.442  | 0.193 $\pm$ 0.101 |
|                      | 4        | 0.521 $\pm$ 0.010 | 0.927 $\pm$ 0.015 | 0.508 $\pm$ 0.009  | 1.085 $\pm$ 0.080  | 0.257 $\pm$ 0.029 |
|                      | 5        | 0.490 $\pm$ 0.019 | 1.058 $\pm$ 0.033 | 0.397 $\pm$ 0.023  | 0.370 $\pm$ 0.117  | 0.100 $\pm$ 0.050 |
| <b>GSH</b>           | 1        | 0.501 $\pm$ 0.056 | 0.510 $\pm$ 0.170 | 0.365 $\pm$ 0.200  | 0.800 $\pm$ 0.395  | 0.191 $\pm$ 0.155 |
|                      | 2        | 0.439 $\pm$ 0.072 | 0.878 $\pm$ 0.116 | 0.342 $\pm$ 0.059  | 0.118 $\pm$ 0.360  | 0.209 $\pm$ 0.109 |
|                      | 3        | 0.424 $\pm$ 0.090 | 0.657 $\pm$ 0.133 | 0.411 $\pm$ 0.092  | 0.833 $\pm$ 0.130  | 0.279 $\pm$ 0.070 |
|                      | 4        | 0.429 $\pm$ 0.058 | 0.702 $\pm$ 0.099 | 0.383 $\pm$ 0.058  | 0.371 $\pm$ 0.162  | 0.246 $\pm$ 0.073 |
|                      | 5        | 0.410 $\pm$ 0.048 | 0.808 $\pm$ 0.116 | 0.279 $\pm$ 0.066  | 0.000 $\pm$ 0.358  | 0.238 $\pm$ 0.048 |

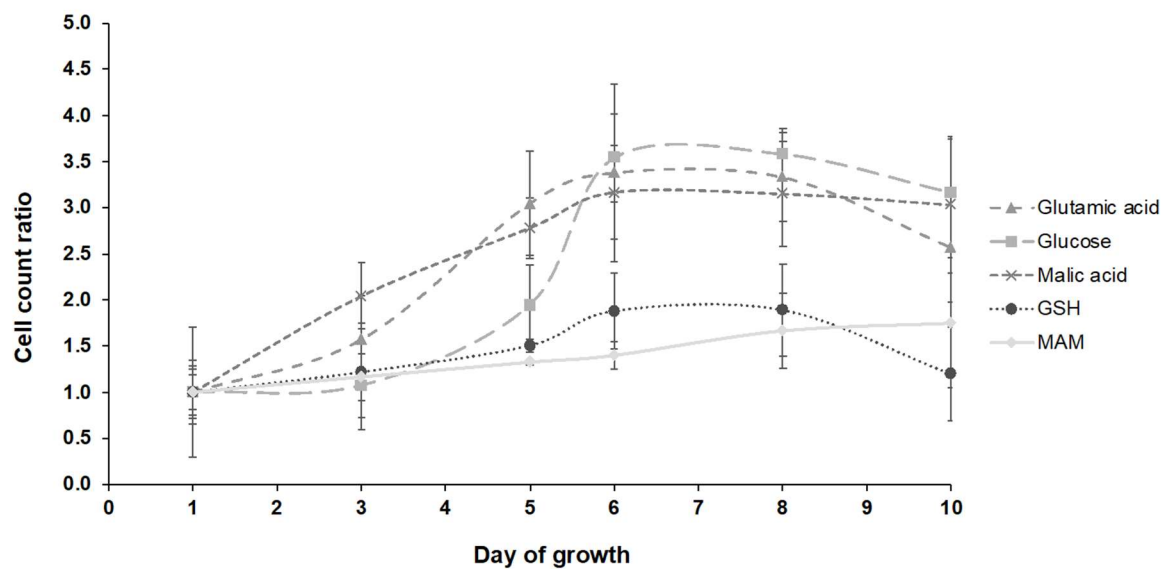

Figure S1. Growth curves in inorganic medium supplemented with carbon sources.

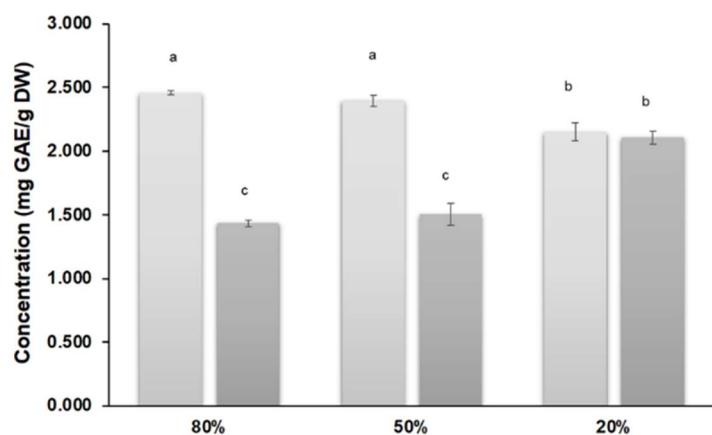

Figure S2. Concentrations of gallic acid equivalent (GAE) found in methanol and ethanol extracts (light and dark gray, respectively). Different superscript letters indicate significant differences ( $p < 0.05$ ) determined by Wilcoxon test.

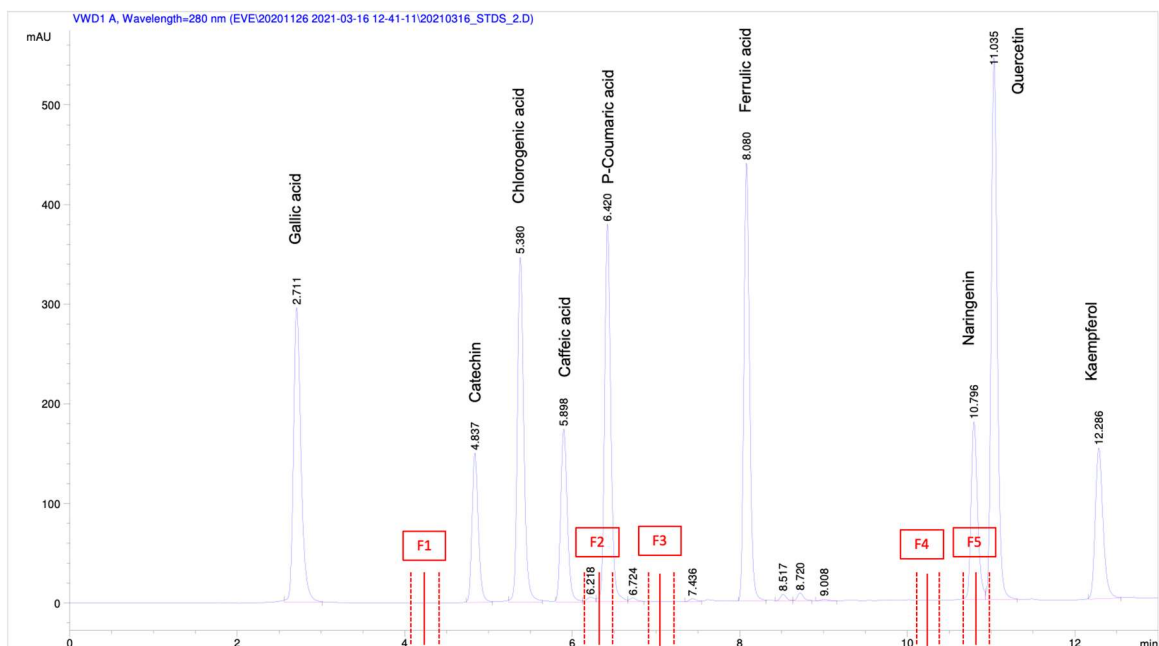

**Figure S3.** Chromatogram of the phenolic standards. F1-F5 indicate the collected fractions in MS analyses

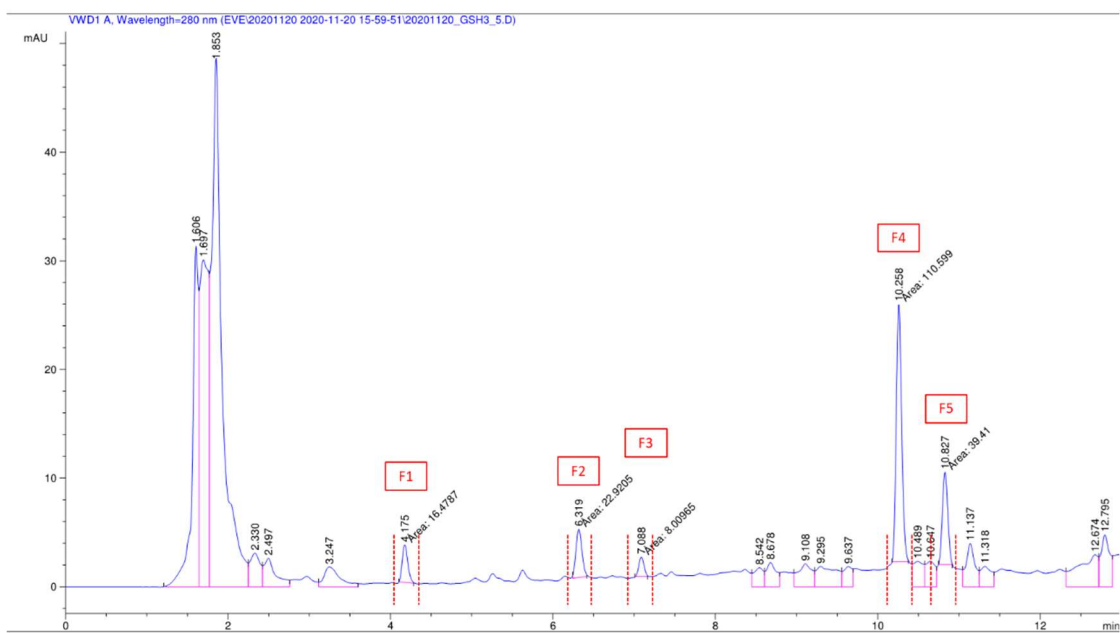

**Figure S4.** Chromatogram of a cellular extract on day 3 of growth in de MAM medium supplemented with GSH. F1-F5 represent the collected fractions used in MS analyses

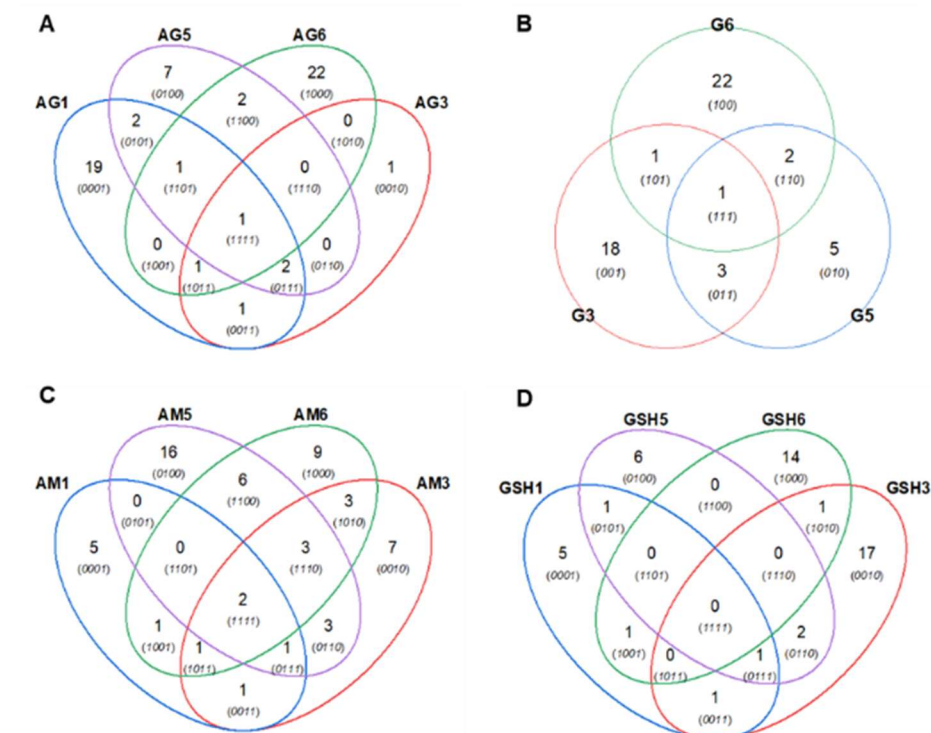

**Figure S5.** Venn diagram of the molecular formulas attributed for each day of the lag phase in the (A) glutamic acid, (B) malic acid, (C) glucose, and (D) GSH amendment. The digit 1 and 0 indicating the groups represented, each group having a specific digit 1 position.

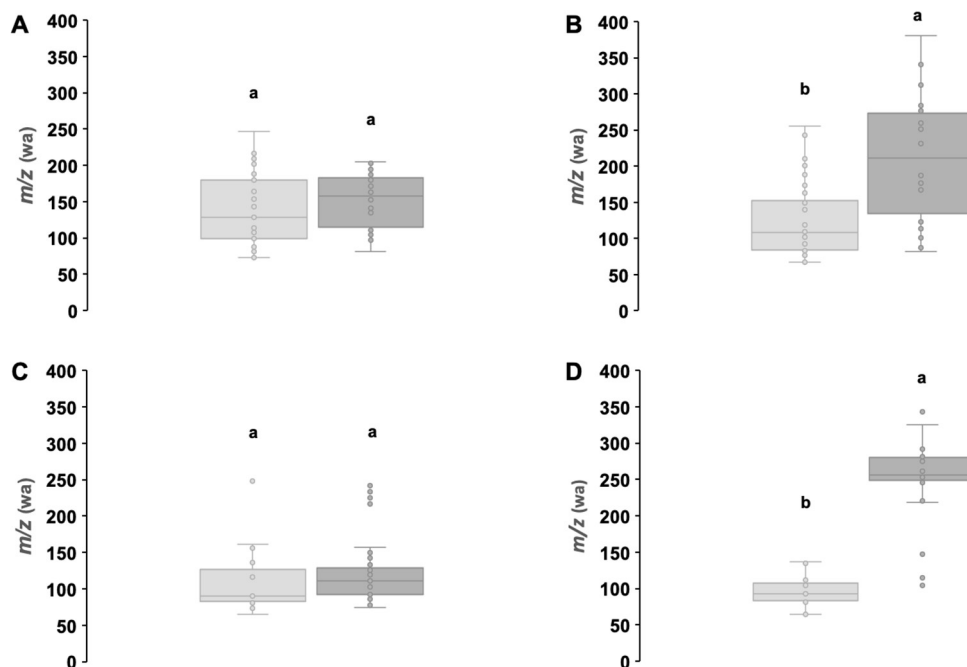

**Figure S6.** Box plot of all the weighted average (wa)  $m/z$  found at the start and at the end of the lag phase in (A) glutamic acid, (B) glucose, (C) malic acid, and (D) GSH amendment. Different superscript letters indicate significant differences ( $p < 0.05$ ) determined by Wilcoxon test.

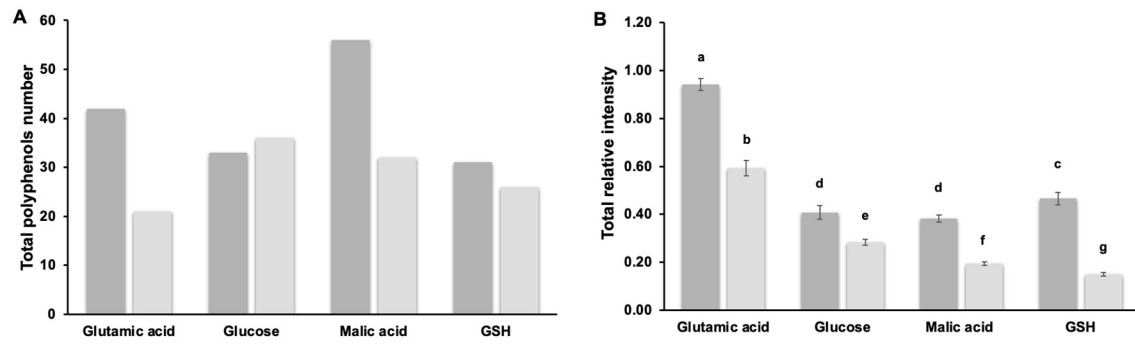

**Figure S7.** (A) Number of polyphenols and (B) their relative intensities associated with the minimum growth rate and the maximum growth rate. Different superscript letters indicate significant differences ( $p < 0.05$ ) determined by Wilcoxon test.
